# Supplementary material for: Mapping surface morphology and phase evolution of iron sulfide nanoparticles
Source: Royal Society of Chemistry journal article supplement (doi:10.1039/d1ce00800e), 2021-01-01
Supplement: d1ce00800e1.pdf [file d1ce00800e1.pdf]

# Mapping Surface Morphology and Phase Evolution of Iron Sulfide Nanoparticles

Tao Yang,<sup>a</sup> Yurong He,<sup>a,b</sup> Xiaotong Liu,<sup>a,b,c</sup> Xiulei Liu,<sup>a</sup> Qing Peng,<sup>\*d, e</sup> Ning Li,<sup>a</sup> Jinjia  
Liu<sup>\*b,c</sup>

<sup>a</sup> *Beijing Advanced Innovation Center for Materials Genome Engineering, Industry-University Cooperation Base between Beijing Information S&T University and Synfuels China Technology Co. Ltd, Beijing, China.*

<sup>b</sup> *State Key Laboratory of Coal Conversion, Institute of Coal Chemistry, Chinese Academy of Sciences, Taiyuan, 030001, P.R. China.*

<sup>c</sup> *National Energy Center for Coal to Clean Fuels, Synfuels China Co., Ltd, Huairou District, Beijing, 101400, P.R. China*

<sup>d</sup> *Physics Department, King Fahd University of Petroleum & Minerals, Dhahran 31261, Saudi Arabia*

<sup>e</sup> *K.A.CARE Energy Research & Innovation Center at Dhahran, Dhahran, 31261, Saudi Arabia*

\* Corresponding author:

Jinjia Liu ([liujinjia@sxicc.ac.cn](mailto:liujinjia@sxicc.ac.cn))

Qing Peng ([qing.peng@kfupm.edu.sa](mailto:qing.peng@kfupm.edu.sa))

## Contents

**Table S1** The lattice constant and k mesh used in surface energy calculations.

**Table S2** The calculated thermodynamic formation energy ( $\Delta G_f$ , eV/atom) with different functional at 0 K and the absolute error (AE, eV/atom) compared to experimental values.

**Table S3** The critical sulfur chemical potential (eV) in different iron sulfide phases.

**Table S4** The contribution (%) of each surface to the total exposed surface area under different sulfur chemical potentials.

**Table S5** The detailed information of Fe nanoparticles with different sizes.

**Table S6** The detailed information of different size FeS-M nanoparticles under varying temperatures.

**Table S7** The detailed information of different size FeS-T nanoparticles under varying temperatures.

**Table S8** The detailed information of different size Fe<sub>9</sub>S<sub>10</sub> nanoparticles under varying temperatures.

**Table S9** The detailed information of different size Fe<sub>7</sub>S<sub>8</sub> nanoparticles under varying temperatures.

**Table S10** The detailed information of different size Fe<sub>3</sub>S<sub>4</sub> nanoparticles under varying temperatures.

**Table S11** The detailed information of different size FeS<sub>2</sub>-P nanoparticles under varying temperatures.

**Table S12** The detailed information of different size FeS<sub>2</sub>-M nanoparticles under varying temperatures.

**Fig. S1** Left: the crystal structures of iron sulfides; Right: the coordination environment of iron atoms in iron sulfides (blue and yellow spheres represent iron and sulfur atoms, respectively).

**Fig. S2** The phonon contribution to the Gibbs free energy (kJ/mol/unit) of Fe<sub>x</sub>S<sub>y</sub> as a function of temperature (K).

**Fig. S3** The reaction free energy ( $\Delta G$ , eV) of per unit iron to sulfides as a function of sulfur chemical potential ( $\mu_S$ , eV) at 700 K, a for bulk phase, b for 10 nm, c for 5 nm, and d for 2 nm.

**Fig. S4** The contour diagram of sulfur chemical potential ( $\mu_S$ , eV) versus temperature and gaseous pressure ( $P_{\text{H}_2\text{S}}/P_{\text{H}_2}$ ), the rectangle regions represents the sulfur chemical potential under typical experimental preparation conditions.

**Fig. S5** The surface energy of FeS-M with different terminations.

**Fig. S6** The surface energy of FeS-T with different terminations.

**Fig. S7** The surface energy of Fe<sub>9</sub>S<sub>10</sub> with different terminations.

**Fig. S8** The surface energy of Fe<sub>7</sub>S<sub>8</sub> with different terminations.

**Fig. S9** The surface energy of Fe<sub>3</sub>S<sub>4</sub> with different terminations.

**Fig. S10** The surface energy of FeS<sub>2</sub>-P with different terminations.

**Fig. S11** The surface energy of FeS<sub>2</sub>-M with different terminations.

**Fig. S12** The surface energy ( $\gamma$ , J/m<sup>2</sup>) of the most stable terminations as a function of sulfur chemical potential ( $\mu_S$ , eV), a-c for FeS-T, Fe<sub>9</sub>S<sub>10</sub>, and FeS<sub>2</sub>-M, respectively.

**Fig. S13** The morphology of Fe nanoparticles with different sizes.

**Fig. S14** The morphology of different size FeS-M nanoparticles under varying temperatures.

**Fig. S15** The morphology of different size FeS-T nanoparticles under varying temperatures.

**Fig. S16** The morphology of different size Fe<sub>9</sub>S<sub>10</sub> nanoparticles under varying temperatures.

**Fig. S17** The morphology of different size Fe<sub>7</sub>S<sub>8</sub> nanoparticles under varying temperatures.

**Fig. S18** The morphology of different size Fe<sub>3</sub>S<sub>4</sub> nanoparticles under varying temperatures.

**Fig. S19** The morphology of different size FeS<sub>2</sub>-P nanoparticles under varying temperatures.

**Fig. S20** The morphology of different size FeS<sub>2</sub>-M nanoparticles under varying temperatures.

**Table S1** The lattice constant and k mesh used in surface energy calculations.

|                                 | <i>hkl</i>      | a×b (Å)     | K-mesh |
|---------------------------------|-----------------|-------------|--------|
| FeS-M                           | (001)           | 3.59×3.59   | 6×6×1  |
|                                 | (100)           | 6.62×3.59   | 4×6×1  |
|                                 | (110)           | 5.56×5.07   | 4×4×1  |
|                                 | (111)           | 5.07×6.62   | 4×4×1  |
|                                 | (112)           | 5.07×7.53   | 4×3×1  |
|                                 | (221)           | 7.53×6.63   | 3×4×1  |
| FeS-T                           | (100)           | 3.33×5.10   | 6×4×1  |
|                                 | (101)           | 6.09×3.33   | 4×6×1  |
|                                 | (102)           | 7.69×3.33   | 3×6×1  |
|                                 | (202)           | 6.09×3.33   | 4×6×1  |
| Fe <sub>9</sub> S <sub>10</sub> | (100)           | 6.61×26.70  | 3×1×1  |
|                                 | (220)           | 26.70×6.61  | 1×3×1  |
|                                 | (111)           | 6.61×27.51  | 3×1×1  |
| Fe <sub>7</sub> S <sub>8</sub>  | (100)           | 6.57×15.52  | 3×2×1  |
|                                 | (110)           | 15.52×11.38 | 2×2×1  |
|                                 | (111)           | 11.38×16.86 | 2×2×1  |
|                                 | (203)           | 35.58×6.57  | 1×3×1  |
|                                 | (10 $\bar{2}$ ) | 6.57×19.25  | 3×1×1  |
|                                 | (20 $\bar{6}$ ) | 6.57×23.31  | 3×1×1  |
| Fe <sub>3</sub> S <sub>4</sub>  | (001)           | 6.70×6.70   | 4×4×1  |
|                                 | (011)           | 9.48×6.70   | 3×4×1  |
|                                 | (311)           | 11.61×6.70  | 2×4×1  |
|                                 | (111)           | 6.70×6.70   | 4×4×1  |
|                                 | (211)           | 16.42×6.70  | 2×4×1  |
|                                 | (220)           | 9.48×6.70   | 3×4×1  |
| FeS <sub>2</sub> -P             | (100)           | 5.40×5.40   | 4×4×1  |
|                                 | (110)           | 5.40×7.63   | 4×3×1  |
|                                 | (111)           | 7.63×7.63   | 3×3×1  |
|                                 | (210)           | 5.40×12.07  | 4×2×1  |
|                                 | (211)           | 9.35×7.63   | 3×3×1  |
|                                 | (230)           | 5.40×19.46  | 4×1×1  |
|                                 | (231)           | 9.35×12.07  | 3×2×1  |
|                                 | (311)           | 13.22×7.63  | 2×3×1  |
| FeS <sub>2</sub> -M             | (001)           | 4.44×5.41   | 5×4×1  |
|                                 | (011)           | 4.44×6.38   | 5×4×1  |
|                                 | (020)           | 3.39×4.44   | 7×5×1  |
|                                 | (11 $\bar{1}$ ) | 6.38×5.58   | 4×5×1  |
|                                 | (1 $\bar{2}$ 1) | 7.77×5.58   | 3×4×1  |
|                                 | (210)           | 3.39×11.69  | 7×2×1  |
|                                 | (211)           | 7.77×6.38   | 3×4×1  |

According to our previous study, PBE + U with  $U_{\text{eff}} = 2.0$  eV could give reasonable structural, magnetic and electronic properties for iron sulfides when compared to experimental observations.<sup>1</sup> Here we assess the performance of different functional in predicting the thermodynamic property of iron sulfides. We calculate the thermodynamic formation energy ( $G_f$ ) of FeS, Fe<sub>7</sub>S<sub>8</sub>, Fe<sub>3</sub>S<sub>4</sub>, and FeS<sub>2</sub>. These phases are selected since the  $G_f$  of these four sulfides are previously reported. In this section, we choose LDA, GGA (PBE and PBEsol), DFT + U ( $U_{\text{eff}} = 2.0/2.5$  eV) and HSE approach. The calculated results and reference data are presented in **Table S2**. LDA approach underestimates  $G_f$  for all these four compounds, whilst PBE approach overestimates the formation energy of these iron sulfides. PBE + U with  $U_{\text{eff}} = 2.0/2.5$  eV also overestimates the thermodynamic formation energies of Fe<sub>x</sub>S<sub>y</sub>, especially for pyrite FeS<sub>2</sub>-P. For the HSE approach, the computational  $G_f$  is extremely overestimated. The overestimation may ascribe to that the twenty-five percent of Hartree-Fock is excessive to describe the Coulomb correlation at Fe sites. It is worth noting that PBEsol could give relatively reasonable predictions on  $G_f$  for Fe<sub>x</sub>S<sub>y</sub>, the maximum absolute error is just 0.05 eV/atom for FeS-M case. Previous work has also proved that PBEsol is better at describing properties for iron carbides.<sup>2</sup> Therefore, all calculations in this work are based on PBEsol functional.

**Table S2** The calculated thermodynamic formation energy ( $\Delta G_f$ , eV/atom) with different functional at 0 K and the absolute error (AE, eV/atom) compared to experimental values.

|         | FeS-M              |       | Fe <sub>7</sub> S <sub>8</sub> |       | Fe <sub>3</sub> S <sub>4</sub> |      | FeS <sub>2</sub> -P |       |
|---------|--------------------|-------|--------------------------------|-------|--------------------------------|------|---------------------|-------|
|         | $\Delta G_f$       | AE    | $\Delta G_f$                   | AE    | $\Delta G_f$                   | AE   | $\Delta G_f$        | AE    |
| LDA     | -0.72              | -0.06 | -0.69                          | -0.15 | -0.61                          | -    | -0.83               | -0.14 |
| PBE     | -0.52              | 0.14  | -0.39                          | 0.15  | -0.39                          | 0.11 | -0.50               | 0.19  |
| PBEsol  | -0.61              | 0.05  | -0.56                          | -0.02 | -0.49                          | 0.01 | -0.72               | -0.03 |
| U = 2.0 | -0.20              | 0.46  | -0.35                          | 0.19  | -0.30                          | 0.20 | -0.38               | 0.31  |
| U = 2.5 | -0.11              | 0.55  | -0.42                          | 0.12  | -0.50                          | 0.00 | -0.35               | 0.34  |
| HSE06   | -0.13              | 0.53  | -0.14                          | 0.40  | -0.33                          | 0.17 | -0.40               | 0.29  |
| Ref.    | -0.66 <sup>3</sup> | -     | -0.54 <sup>4</sup>             | -     | -0.50 <sup>5</sup>             | -    | -0.69 <sup>6</sup>  | -     |

**Table S3** The critical sulfur chemical potential (eV) in different iron sulfide phases.

| $\text{Fe}_x\text{S}_y$         | $\mu_S^{\text{criti}}$ (eV) |
|---------------------------------|-----------------------------|
| FeS-M                           | -4.36                       |
| FeS-T                           | -3.95                       |
| Fe <sub>9</sub> S <sub>10</sub> | -4.13                       |
| Fe <sub>7</sub> S <sub>8</sub>  | -4.18                       |
| Fe <sub>3</sub> S <sub>4</sub>  | -4.0                        |
| FeS <sub>2</sub> -P             | -4.23                       |
| FeS <sub>2</sub> -M             | -4.23                       |

**Table S4** The contribution (%) of each surface to the total exposed surface area under different sulfur chemical potentials.

| $\text{Fe}_x\text{S}_y$         | (hkl) | $\mu_s$ (eV) |      |      |
|---------------------------------|-------|--------------|------|------|
|                                 |       | -3.8         | -3.4 | -3.0 |
| FeS-M                           | (001) | 16.6         | 6.8  | 0.1  |
|                                 | (101) | 14.3         | 15.3 | 17.1 |
|                                 | (111) | 29.8         | 34.4 | 42.9 |
|                                 | (112) | 39.3         | 43.5 | 39.9 |
| FeS-T                           | (100) | 26.6         | 76.4 | 52.7 |
|                                 | (101) | 0            | 0    | 47.3 |
|                                 | (102) | 34.8         | 23.6 | 0    |
|                                 | (202) | 38.6         | 0    | 0    |
| Fe <sub>9</sub> S <sub>10</sub> | (100) | 3.8          | 2.6  | 0    |
|                                 | (110) | 32.7         | 64.9 | 88.6 |
|                                 | (111) | 63.5         | 32.5 | 11.4 |
| Fe <sub>7</sub> S <sub>8</sub>  | (100) | 3.0          | 62.4 | 96.4 |
|                                 | (111) | 34.7         | 0    | 0    |
|                                 | (203) | 0.3          | 0    | 0    |
|                                 | (102) | 62.0         | 37.6 | 3.6  |
| Fe <sub>3</sub> S <sub>4</sub>  | (001) | 4.0          | 54.1 | 3.8  |
|                                 | (011) | 50.5         | 41.7 | 0    |
|                                 | (311) | 45.5         | 4.2  | 96.2 |
| FeS <sub>2</sub> -P             | (100) | 18.8         | 0    | 11.7 |
|                                 | (210) | 51.6         | 70.6 | 61.8 |
|                                 | (211) | 30.0         | 16.0 | 3.2  |
|                                 | (311) | 0            | 13.4 | 23.3 |
| FeS <sub>2</sub> -M             | (001) | 1.1          | 0    | 0    |
|                                 | (011) | 12.5         | 36.1 | 67.8 |
|                                 | (020) | 1.1          | 0    | 0    |
|                                 | (120) | 21.5         | 19.5 | 6.8  |
|                                 | (111) | 29.5         | 12.9 | 0    |
|                                 | (121) | 0.1          | 0    | 0    |
|                                 | (211) | 34.2         | 31.5 | 25.4 |

**Table S5** The detailed information of Fe nanoparticles with different sizes.

| Particle size (nm) | Number of atoms | Surface area ( $\text{\AA}^2$ ) | Corrected surface energy (kJ/mol) |
|--------------------|-----------------|---------------------------------|-----------------------------------|
| 10                 | 38669           | 29257.83                        | 446337.4                          |
| 5                  | 5085            | 7314.458                        | 111584.4                          |
| 2                  | 339             | 1170.312                        | 17853.5                           |



**Table S6** The detailed information of different size FeS-M nanoparticles under varying temperatures.

| Particle size (nm) | Temperature (K) | Number of atoms | Surface area (Å <sup>2</sup> ) | Corrected surface energy (kJ/mol) |
|--------------------|-----------------|-----------------|--------------------------------|-----------------------------------|
| 10                 | 100             | 30113           | 31460.37                       | 119191.2                          |
|                    | 200             | 29969           | 31283.52                       | 121394.2                          |
|                    | 300             | 29969           | 31088.39                       | 123779.4                          |
|                    | 400             | 29969           | 30889.97                       | 126161.1                          |
|                    | 500             | 29263           | 30687.38                       | 128550                            |
|                    | 600             | 29007           | 30481.74                       | 130936.2                          |
|                    | 700             | 29007           | 30273.88                       | 133313.3                          |
|                    | 800             | 29007           | 30064.2                        | 135675.6                          |
|                    | 900             | 29007           | 29853.59                       | 138017.2                          |
|                    | 1000            | 29637           | 29642.92                       | 140332.1                          |
| 5                  | 100             | 3705            | 7865.108                       | 29797.85                          |
|                    | 200             | 3705            | 7820.896                       | 30348.6                           |
|                    | 300             | 3705            | 7772.102                       | 30944.88                          |
|                    | 400             | 3705            | 7722.49                        | 31540.25                          |
|                    | 500             | 3543            | 7671.852                       | 32137.54                          |
|                    | 600             | 3543            | 7620.438                       | 32734.06                          |
|                    | 700             | 3479            | 7568.468                       | 33328.31                          |
|                    | 800             | 3479            | 7516.054                       | 33918.92                          |
|                    | 900             | 3479            | 7463.418                       | 34504.4                           |
|                    | 1000            | 3775            | 7410.722                       | 35082.99                          |
| 2                  | 100             | 239             | 1258.416                       | 4767.651                          |
|                    | 200             | 235             | 1251.341                       | 4855.768                          |
|                    | 300             | 235             | 1243.536                       | 4951.178                          |
|                    | 400             | 235             | 1235.597                       | 5046.434                          |
|                    | 500             | 235             | 1227.495                       | 5142.003                          |
|                    | 600             | 235             | 1219.273                       | 5237.461                          |
|                    | 700             | 235             | 1210.954                       | 5332.524                          |
|                    | 800             | 235             | 1202.57                        | 5427.036                          |
|                    | 900             | 235             | 1194.145                       | 5520.693                          |
|                    | 1000            | 235             | 1185.716                       | 5613.284                          |

**Table S7** The detailed information of different size FeS-T nanoparticles under varying temperatures.

| Particle size (nm) | Temperature (K) | Number of atoms | Surface area (Å <sup>2</sup> ) | Corrected surface energy (kJ/mol) |
|--------------------|-----------------|-----------------|--------------------------------|-----------------------------------|
| 10                 | 100             | 15801           | 18103.55                       | 42147.15                          |
|                    | 200             | 18277           | 19204.82                       | 48943.57                          |
|                    | 300             | 20905           | 20291.93                       | 56524.63                          |
|                    | 400             | 23159           | 21270.48                       | 64234.07                          |
|                    | 500             | 25805           | 22146.88                       | 72010.27                          |
|                    | 600             | 27795           | 22918.38                       | 79712.23                          |
|                    | 700             | 30735           | 24919.04                       | 92137.6                           |
|                    | 800             | 39395           | 27958.08                       | 109240.9                          |
|                    | 900             | 46925           | 31329.36                       | 128600.1                          |
|                    | 1000            | 55783           | 34675.98                       | 149568.2                          |
| 5                  | 100             | 1897            | 4525.891                       | 10536.8                           |
|                    | 200             | 2221            | 4801.201                       | 12235.89                          |
|                    | 300             | 2533            | 5072.982                       | 14131.16                          |
|                    | 400             | 2747            | 5317.62                        | 16058.51                          |
|                    | 500             | 3083            | 5536.722                       | 18002.58                          |
|                    | 600             | 3503            | 5729.6                         | 19928.08                          |
|                    | 700             | 3893            | 6229.764                       | 23034.42                          |
|                    | 800             | 4685            | 6989.526                       | 27310.25                          |
|                    | 900             | 5693            | 7832.352                       | 32150.07                          |
|                    | 1000            | 7081            | 8669.011                       | 33987.28                          |
| 2                  | 100             | 113             | 724.1418                       | 1685.887                          |
|                    | 200             | 147             | 768.1938                       | 1957.745                          |
|                    | 300             | 135             | 811.6788                       | 2260.99                           |
|                    | 400             | 207             | 850.8204                       | 2569.366                          |
|                    | 500             | 207             | 885.8736                       | 2880.407                          |
|                    | 600             | 207             | 916.7358                       | 3188.491                          |
|                    | 700             | 267             | 996.7632                       | 3685.509                          |
|                    | 800             | 315             | 1118.326                       | 4369.643                          |
|                    | 900             | 315             | 1253.178                       | 5144.018                          |
|                    | 1000            | 423             | 1387.046                       | 5982.761                          |

**Table S8** The detailed information of different size Fe<sub>9</sub>S<sub>10</sub> nanoparticles under varying temperatures.

| Particle size (nm) | Temperature (K) | Number of atoms | Surface area (Å <sup>2</sup> ) | Corrected surface energy (kJ/mol) |
|--------------------|-----------------|-----------------|--------------------------------|-----------------------------------|
| 10                 | 100             | 42453           | 44531.13                       | 198378.6                          |
|                    | 200             | 47967           | 46208.88                       | 215080.2                          |
|                    | 300             | 53151           | 48014.29                       | 233899.9                          |
|                    | 400             | 53517           | 49801.16                       | 253404.6                          |
|                    | 500             | 59055           | 51573.33                       | 273618.3                          |
|                    | 600             | 64527           | 53315.96                       | 294348.3                          |
|                    | 700             | 69891           | 55016.85                       | 315393.4                          |
|                    | 800             | 75099           | 56663.29                       | 336516.7                          |
|                    | 900             | 80097           | 58240.61                       | 357414.9                          |
|                    | 1000            | 84843           | 59732.62                       | 377722.7                          |
| 5                  | 100             | 5479            | 11132.82                       | 49594.79                          |
|                    | 200             | 6835            | 11552.24                       | 53770.08                          |
|                    | 300             | 6835            | 12003.55                       | 58474.84                          |
|                    | 400             | 6835            | 12450.31                       | 63351.21                          |
|                    | 500             | 8197            | 12893.32                       | 68404.55                          |
|                    | 600             | 8197            | 13328.98                       | 73587.05                          |
|                    | 700             | 9511            | 13754.22                       | 78848.38                          |
|                    | 800             | 9511            | 14165.83                       | 84129.24                          |
|                    | 900             | 10729           | 14560.16                       | 89353.77                          |
|                    | 1000            | 10729           | 14933.18                       | 94430.91                          |
| 2                  | 100             | 343             | 1781.246                       | 7935.156                          |
|                    | 200             | 343             | 1848.349                       | 8603.194                          |
|                    | 300             | 487             | 1920.563                       | 9355.969                          |
|                    | 400             | 565             | 1992.046                       | 10136.17                          |
|                    | 500             | 565             | 2062.928                       | 10944.72                          |
|                    | 600             | 565             | 2132.636                       | 11773.92                          |
|                    | 700             | 565             | 2200.669                       | 12615.72                          |
|                    | 800             | 565             | 2266.526                       | 13460.64                          |
|                    | 900             | 763             | 2329.622                       | 14296.58                          |
|                    | 1000            | 763             | 2389.305                       | 15108.93                          |

**Table S9** The detailed information of different size Fe<sub>7</sub>S<sub>8</sub> nanoparticles under varying temperatures.

| Particle size (nm) | Temperature (K) | Number of atoms | Surface area (Å <sup>2</sup> ) | Corrected surface energy (kJ/mol) |
|--------------------|-----------------|-----------------|--------------------------------|-----------------------------------|
| 10                 | 100             | 10705           | 15937.56                       | 41700.86                          |
|                    | 200             | 12731           | 17390.46                       | 48549.86                          |
|                    | 300             | 14781           | 19033.38                       | 56703.63                          |
|                    | 400             | 16911           | 20712.49                       | 65622.97                          |
|                    | 500             | 19615           | 22298.36                       | 75005.59                          |
|                    | 600             | 21729           | 23740.65                       | 84125.9                           |
|                    | 700             | 24149           | 25115.42                       | 92301.11                          |
|                    | 800             | 24996           | 25751.92                       | 96401.77                          |
|                    | 900             | 25222           | 25986.91                       | 97277.72                          |
|                    | 1000            | 25101           | 26133.84                       | 96829.43                          |
| 5                  | 100             | 1353            | 3984.39                        | 10425.21                          |
|                    | 200             | 1614            | 4347.612                       | 12137.46                          |
|                    | 300             | 1875            | 4758.336                       | 14175.88                          |
|                    | 400             | 2125            | 5178.126                       | 16405.75                          |
|                    | 500             | 2433            | 5574.592                       | 18751.41                          |
|                    | 600             | 2697            | 5935.147                       | 21031.42                          |
|                    | 700             | 3027            | 6278.867                       | 23075.32                          |
|                    | 800             | 3100            | 6437.98                        | 24100.44                          |
|                    | 900             | 3116            | 6496.727                       | 24319.43                          |
|                    | 1000            | 3126            | 6533.458                       | 24207.35                          |
| 2                  | 100             | 85              | 637.503                        | 1668.036                          |
|                    | 200             | 93              | 695.6172                       | 1941.992                          |
|                    | 300             | 113             | 761.3364                       | 2268.148                          |
|                    | 400             | 124             | 828.4993                       | 2624.919                          |
|                    | 500             | 158             | 891.9351                       | 3000.227                          |
|                    | 600             | 179             | 949.6265                       | 3365.038                          |
|                    | 700             | 197             | 1004.617                       | 3692.044                          |
|                    | 800             | 203             | 1030.081                       | 3856.085                          |
|                    | 900             | 199             | 1039.479                       | 3891.119                          |
|                    | 1000            | 197             | 1045.349                       | 3873.162                          |

**Table S10** The detailed information of different size Fe<sub>3</sub>S<sub>4</sub> nanoparticles under varying temperatures.

| Particle size (nm) | Temperature (K) | Number of atoms | Surface area (Å <sup>2</sup> ) | Corrected surface energy (kJ/mol) |
|--------------------|-----------------|-----------------|--------------------------------|-----------------------------------|
| 10                 | 100             | 59430           | 15162.54                       | 58802.14                          |
|                    | 200             | 55398           | 14555.84                       | 56780.68                          |
|                    | 300             | 51222           | 13748.3                        | 54152.22                          |
|                    | 400             | 45432           | 12982.75                       | 51458.87                          |
|                    | 500             | 41176           | 12221.46                       | 48672.03                          |
|                    | 600             | 41176           | 11472.42                       | 45837.17                          |
|                    | 700             | 36176           | 10743.41                       | 42980.92                          |
|                    | 800             | 36488           | 10763.01                       | 43152.05                          |
|                    | 900             | 31560           | 10327.64                       | 41465.32                          |
|                    | 1000            | 31032           | 9815.839                       | 39319.95                          |
| 5                  | 100             | 6972            | 3790.646                       | 14700.58                          |
|                    | 200             | 6972            | 3638.96                        | 14195.17                          |
|                    | 300             | 5992            | 3437.067                       | 13538.02                          |
|                    | 400             | 5644            | 3245.683                       | 12864.69                          |
|                    | 500             | 5644            | 3055.367                       | 12168.01                          |
|                    | 600             | 5644            | 2868.108                       | 11459.3                           |
|                    | 700             | 4400            | 2685.852                       | 10745.23                          |
|                    | 800             | 4400            | 2690.753                       | 10788.01                          |
|                    | 900             | 4400            | 2581.914                       | 10366.35                          |
|                    | 1000            | 4256            | 2453.961                       | 9829.992                          |
| 2                  | 100             | 448             | 606.5022                       | 2352.089                          |
|                    | 200             | 448             | 582.233                        | 2271.226                          |
|                    | 300             | 448             | 549.9313                       | 2166.084                          |
|                    | 400             | 448             | 519.31                         | 2058.354                          |
|                    | 500             | 448             | 488.8589                       | 1946.882                          |
|                    | 600             | 448             | 458.898                        | 1833.491                          |
|                    | 700             | 448             | 429.7368                       | 1719.238                          |
|                    | 800             | 364             | 430.5205                       | 1726.082                          |
|                    | 900             | 180             | 413.1043                       | 1658.609                          |
|                    | 1000            | 180             | 392.6336                       | 1572.798                          |

**Table S11** The detailed information of different size FeS<sub>2</sub>-P nanoparticles under varying temperatures.

| Particle size (nm) | Temperature (K) | Number of atoms | Surface area (Å <sup>2</sup> ) | Corrected surface energy (kJ/mol) |
|--------------------|-----------------|-----------------|--------------------------------|-----------------------------------|
| 10                 | 100             | 16965           | 18932.78                       | 164811.8                          |
|                    | 200             | 24617           | 24140.16                       | 188819.4                          |
|                    | 300             | 24923           | 24493.13                       | 194457.8                          |
|                    | 400             | 25523           | 24853.73                       | 200338.9                          |
|                    | 500             | 26461           | 25224.29                       | 206511.9                          |
|                    | 600             | 27067           | 25549.05                       | 212880.4                          |
|                    | 700             | 27259           | 25865.36                       | 219290.7                          |
|                    | 800             | 27697           | 26174.74                       | 225668.9                          |
|                    | 900             | 28669           | 26475.77                       | 231924.5                          |
|                    | 1000            | 28981           | 26767.13                       | 237957.4                          |
| 5                  | 100             | 2137            | 4733.191                       | 41202.91                          |
|                    | 200             | 3069            | 6035.064                       | 47205                             |
|                    | 300             | 3129            | 6123.281                       | 48614.47                          |
|                    | 400             | 3213            | 6213.439                       | 50084.79                          |
|                    | 500             | 3285            | 6306.067                       | 51627.93                          |
|                    | 600             | 3291            | 6387.261                       | 53220.12                          |
|                    | 700             | 3417            | 6466.363                       | 54822.85                          |
|                    | 800             | 3423            | 6543.692                       | 56417.25                          |
|                    | 900             | 3603            | 6618.944                       | 57981.14                          |
|                    | 1000            | 3615            | 6691.773                       | 59489.29                          |
| 2                  | 100             | 131             | 757.3102                       | 6592.457                          |
|                    | 200             | 203             | 965.6086                       | 7552.794                          |
|                    | 300             | 203             | 979.7278                       | 7778.327                          |
|                    | 400             | 203             | 994.151                        | 8013.573                          |
|                    | 500             | 211             | 1008.972                       | 8260.487                          |
|                    | 600             | 211             | 1021.963                       | 8515.233                          |
|                    | 700             | 229             | 1034.618                       | 8771.662                          |
|                    | 800             | 235             | 1046.99                        | 9026.757                          |
|                    | 900             | 235             | 1059.029                       | 9276.966                          |
|                    | 1000            | 235             | 1070.68                        | 9518.246                          |

**Table S12** The detailed information of different size FeS<sub>2</sub>-M nanoparticles under varying temperatures.

| Particle size (nm) | Temperature (K) | Number of atoms | Surface area (Å <sup>2</sup> ) | Corrected surface energy (kJ/mol) |
|--------------------|-----------------|-----------------|--------------------------------|-----------------------------------|
| 10                 | 100             | 14953           | 17974.57                       | 119726.9                          |
|                    | 200             | 15489           | 18650.1                        | 127383.9                          |
|                    | 300             | 16999           | 19410.64                       | 136086.8                          |
|                    | 400             | 18083           | 20202.72                       | 145234.7                          |
|                    | 500             | 19265           | 21033.05                       | 154906.7                          |
|                    | 600             | 20255           | 21901.24                       | 165098.5                          |
|                    | 700             | 21883           | 22807.98                       | 175816.7                          |
|                    | 800             | 23147           | 23754.38                       | 187071.1                          |
|                    | 900             | 24873           | 24740.94                       | 198861.1                          |
|                    | 1000            | 25845           | 25764.8                        | 211177.5                          |
| 5                  | 100             | 1923            | 4493.648                       | 29931.76                          |
|                    | 200             | 1965            | 4662.525                       | 31845.98                          |
|                    | 300             | 2113            | 4852.648                       | 34021.62                          |
|                    | 400             | 2245            | 5050.683                       | 36308.71                          |
|                    | 500             | 2329            | 5258.256                       | 38726.63                          |
|                    | 600             | 2497            | 5475.32                        | 41274.71                          |
|                    | 700             | 2633            | 5701.964                       | 43953.92                          |
|                    | 800             | 2921            | 5938.604                       | 46767.85                          |
|                    | 900             | 3149            | 6185.228                       | 49715.23                          |
|                    | 1000            | 3255            | 6441.186                       | 52794.24                          |
| 2                  | 100             | 131             | 718.9829                       | 4789.074                          |
|                    | 200             | 131             | 746.0028                       | 5095.347                          |
|                    | 300             | 143             | 776.4248                       | 5443.468                          |
|                    | 400             | 143             | 808.1076                       | 5809.383                          |
|                    | 500             | 165             | 841.322                        | 6196.268                          |
|                    | 600             | 167             | 876.0496                       | 6603.94                           |
|                    | 700             | 179             | 912.3176                       | 7032.654                          |
|                    | 800             | 205             | 950.1748                       | 7482.841                          |
|                    | 900             | 213             | 989.6348                       | 7954.422                          |
|                    | 1000            | 213             | 1030.594                       | 8447.112                          |

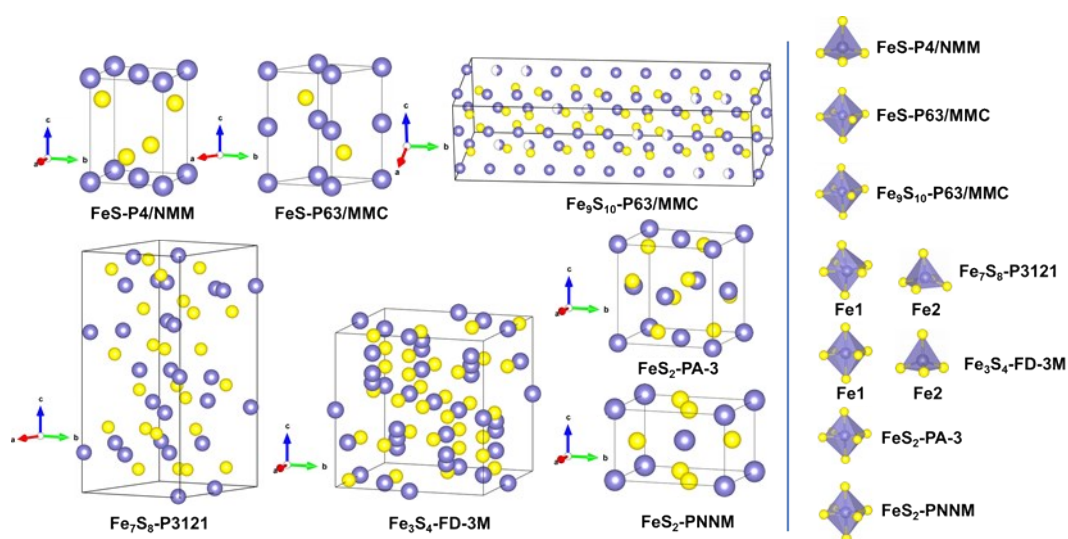

**Fig. S1** Left: the crystal structures of iron sulfides; Right: the coordination environment of iron atoms in iron sulfides (blue and yellow spheres represent iron and sulfur atoms, respectively).



The main contribution of temperature on Gibbs free energy ( $G$ ) for solid materials is derived from lattice vibration, namely, the phonon effect. According to our phonon calculations, as shown in **Fig. S2**, one can find that at low temperature, the phonon has a positive effect on  $G$ , in other words, the phonon effect makes these iron sulfides unstable. However, with the increasing of temperature, the contribution of phonon effect makes iron sulfides more stable in thermodynamic.

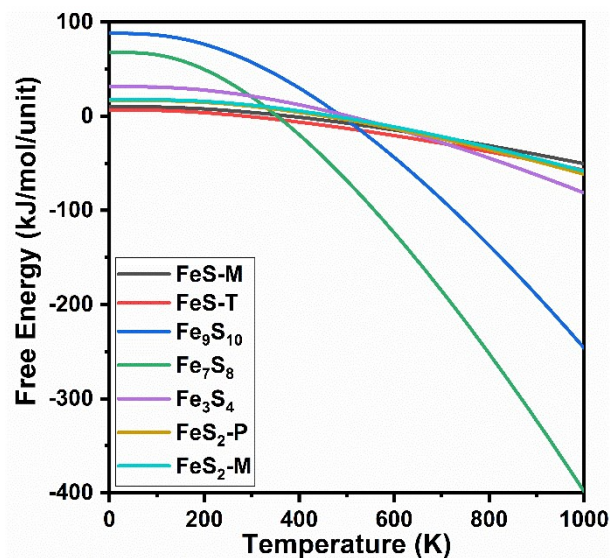

**Fig. S2** The phonon contribution to the Gibbs free energy (kJ/mol/unit) of  $\text{Fe}_x\text{S}_y$  as a function of temperature (K).

The reaction free energy ( $\Delta G$ ) from per unit iron to seven iron sulfide phases as a function of  $\mu_s$  is plotted in **Fig. S3**. In general, with the  $\mu_s$  increasing, the  $\Delta G$  is lowered, suggesting that the formation of sulfide is more facile under high external chemical potential. For the bulk phase (**Fig. S3a**), the  $\Delta G$  from Fe to two polymorph  $\text{FeS}_2$  is very close and much lower than other reactions, indicating that the formation of  $\text{FeS}_2$  phases is thermodynamically more favourable. For 10 nm particles (**Fig. S3b**), the  $\Delta G$  of  $\text{Fe} \rightarrow \text{FeS}_2$  is slightly rising compared with the bulk phase, but still lower than the  $\Delta G$  of other transformations. Meanwhile, the formation of  $\text{FeS-M}$  and  $\text{Fe}_7\text{S}_8$  is more exothermal relative to the bulk phase.

As for 5 nm nanoparticles (**Fig. S3c**), the  $\Delta G$  of  $\text{FeS}_2\text{-P}$  formation is slightly lower than that of  $\text{FeS}_2\text{-M}$  phase. When  $\mu_s$  is around -3.78 eV, the  $\Delta G$  of Fe to  $\text{FeS-M}$  and to  $\text{FeS}_2\text{-P}$  is almost the same, demonstrating that under current conditions, the iron could be sulfurized to mixed phases of  $\text{FeS-M}$  and  $\text{FeS}_2\text{-P}$ . With the particle size of 2 nm, as presented in **Fig. S3d**, when the  $\mu_s$  is lower than -3.65 eV, the  $\Delta G$  of  $\text{FeS-M}$  and  $\text{Fe}_3\text{S}_4$  formation is very close. When  $-3.65 < \mu_s < -3.26$  eV, the formation of  $\text{Fe}_3\text{S}_4$  is more facile than other phases. However, if  $\mu_s > -3.26$  eV, the  $\Delta G$  of  $\text{Fe} \rightarrow \text{FeS}_2\text{-P}$  is the lowest.

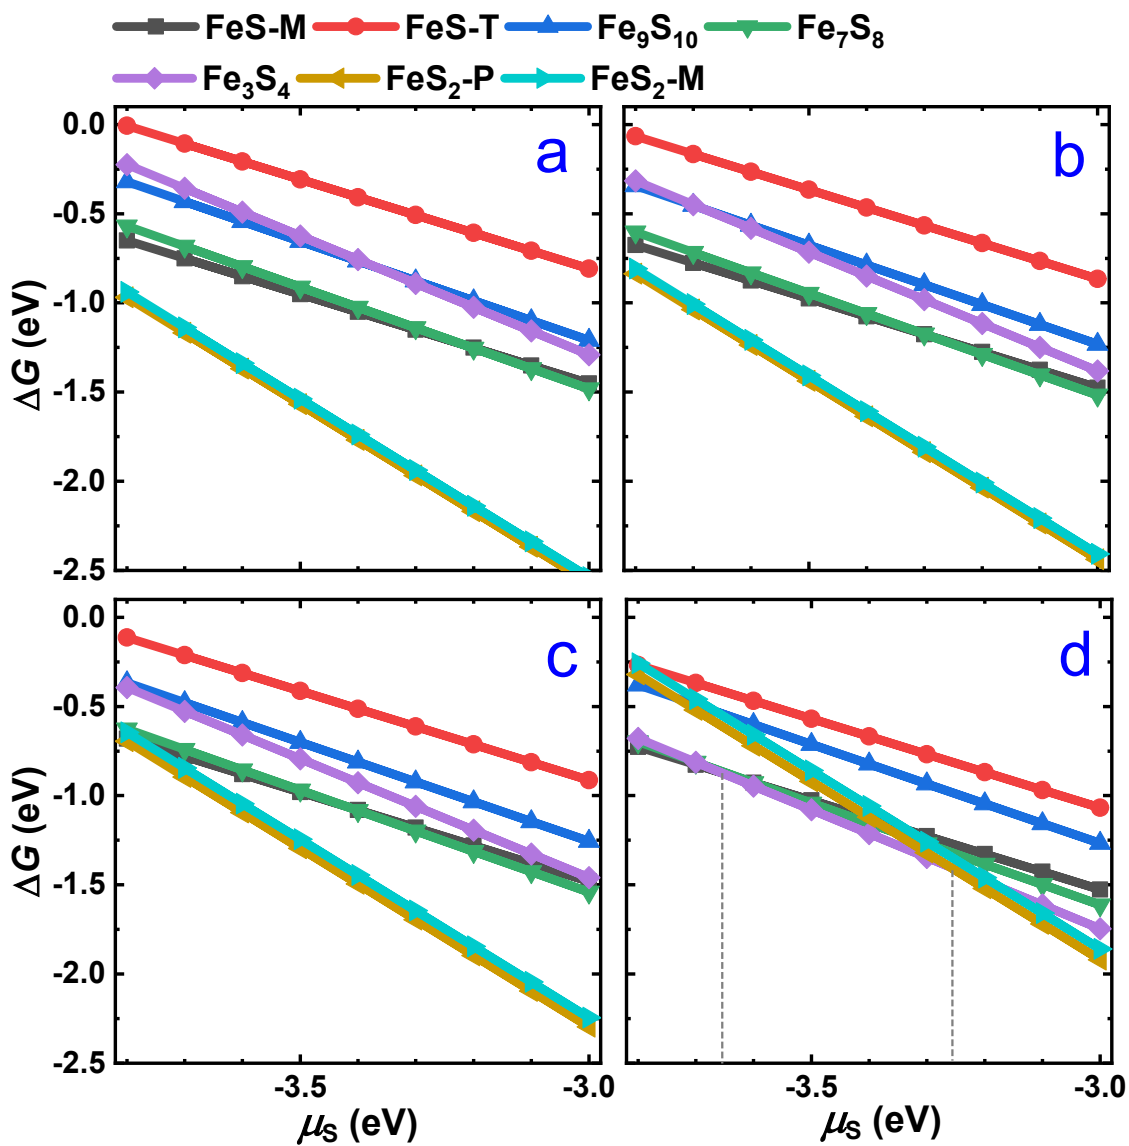

**Fig. S3** The reaction free energy ( $\Delta G$ , eV) of per unit iron to sulfides as a function of sulfur chemical potential ( $\mu_s$ , eV) at 700 K, **a** for bulk phase, **b** for 10 nm, **c** for 5 nm, and **d** for 2 nm.

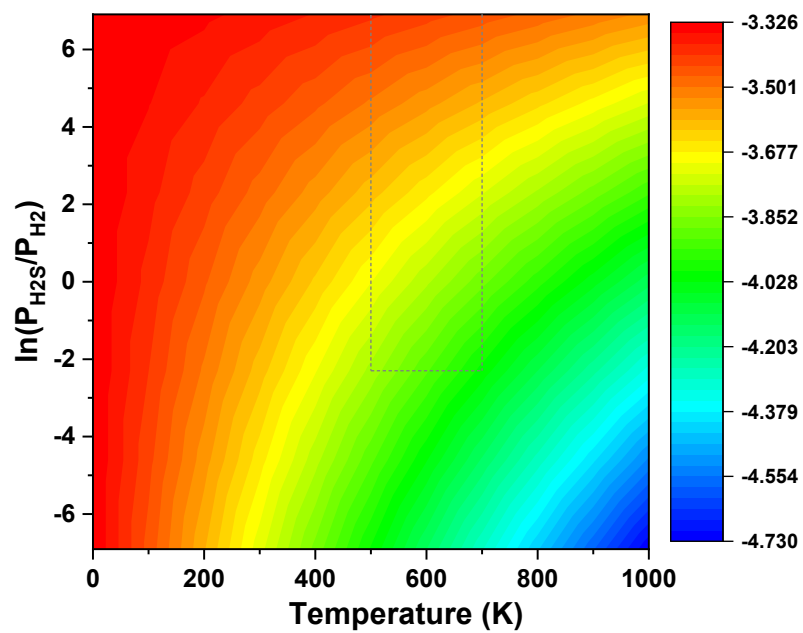

**Fig. S4** The contour diagram of sulfur chemical potential ( $\mu_s$ , eV) versus temperature and gaseous pressure ( $P_{H_2S}/P_{H_2}$ ), the rectangle regions represents the sulfur chemical potential under typical experimental preparation conditions.

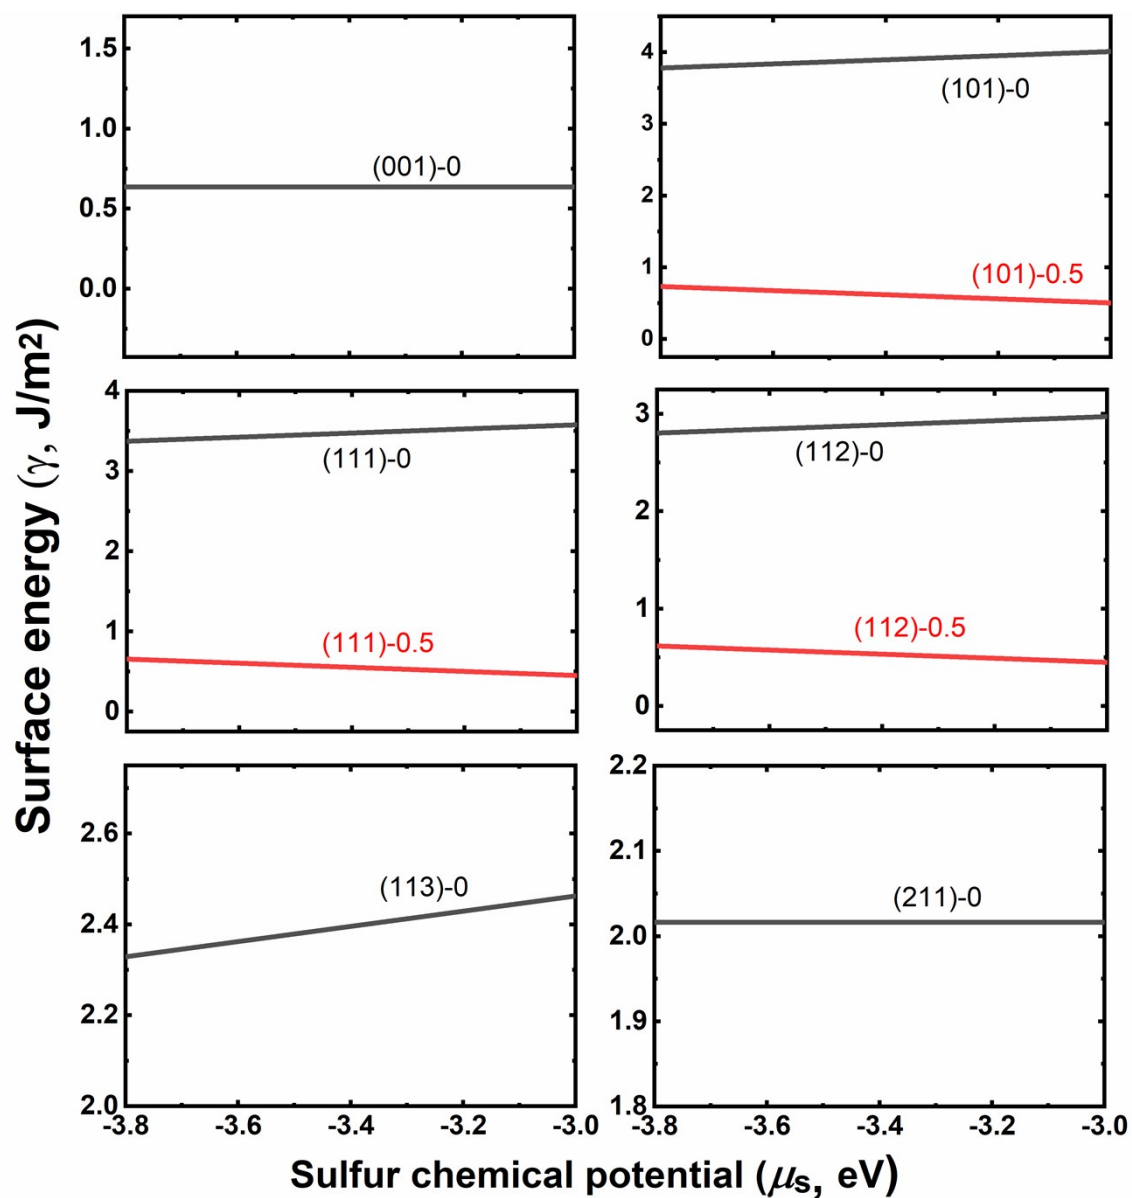

Fig. S5 The surface energy of FeS-M with different terminations.

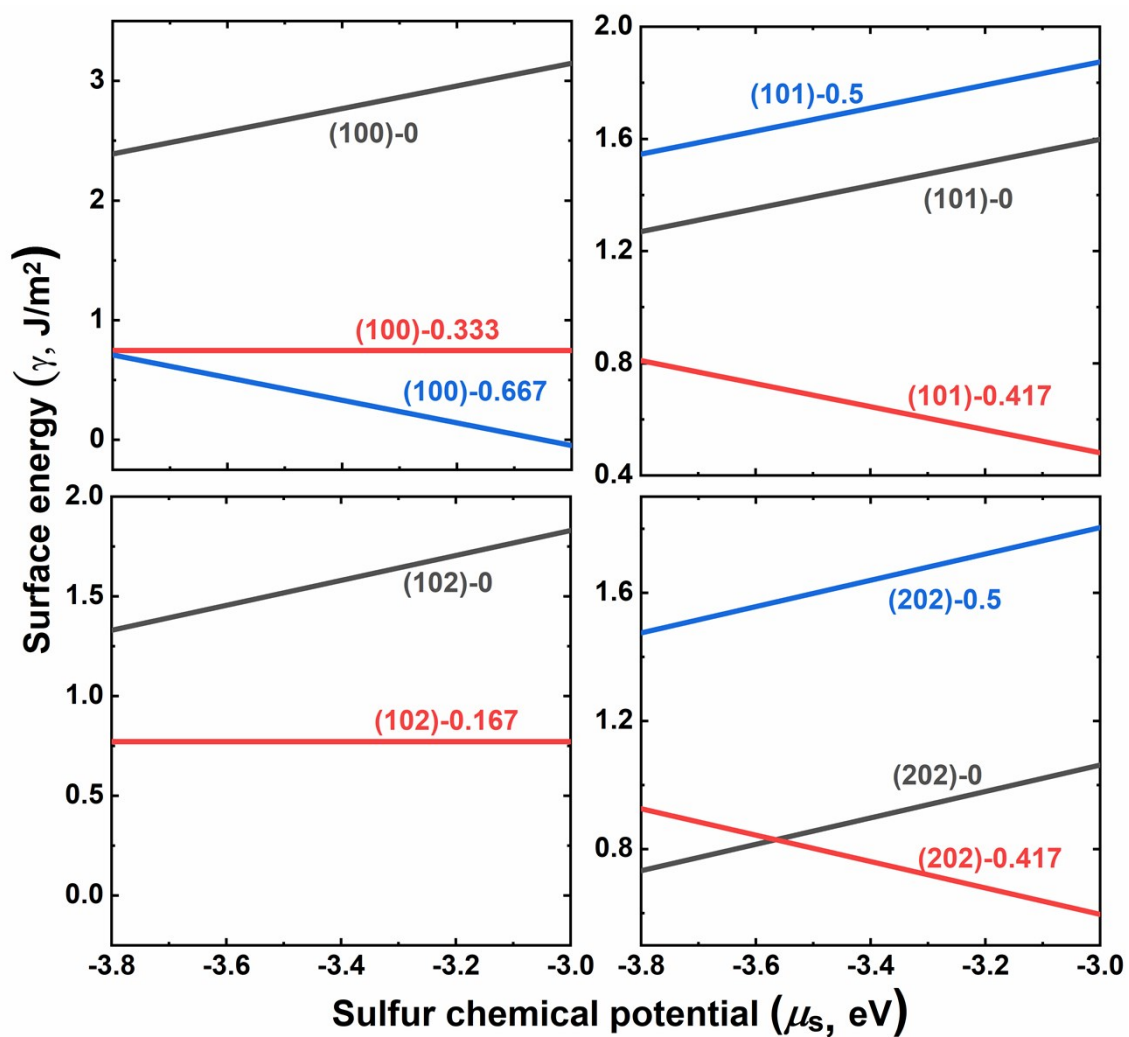

Fig. S6 The surface energy of FeS-T with different terminations.

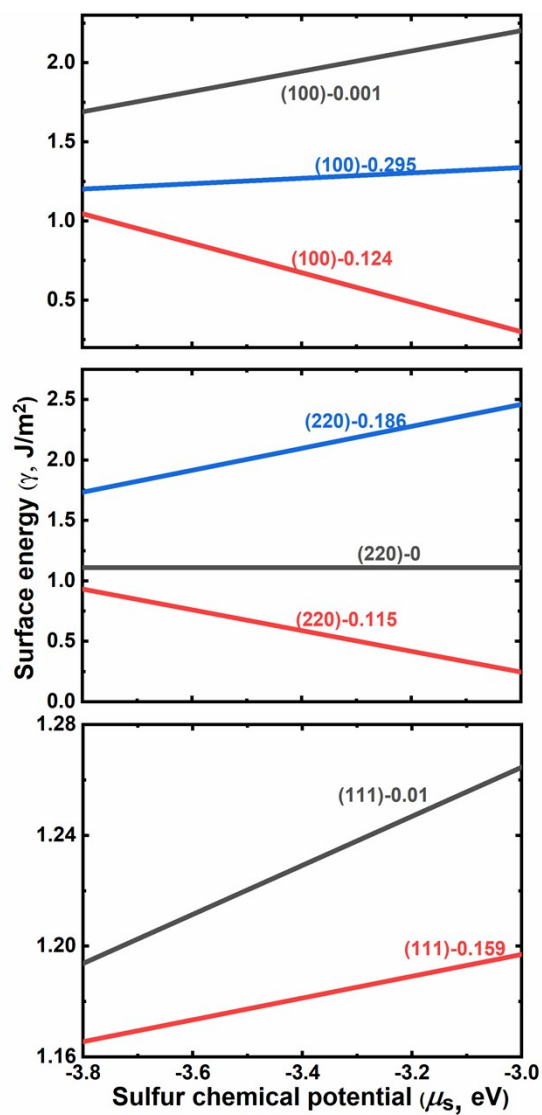

**Fig. S7** The surface energy of  $\text{Fe}_9\text{S}_{10}$  with different terminations.

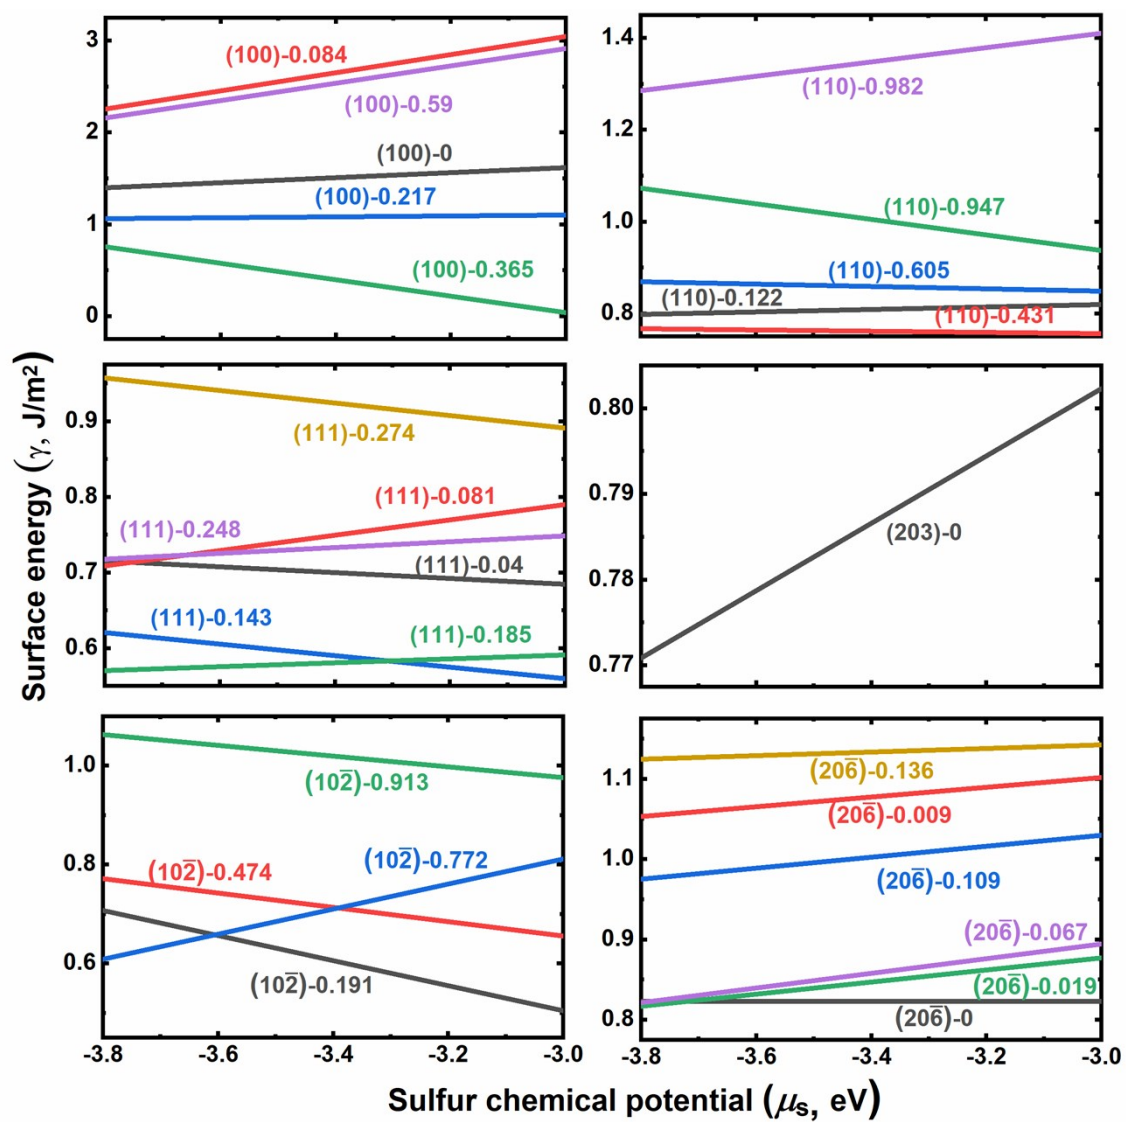

Fig. S8 The surface energy of  $\text{Fe}_7\text{S}_8$  with different terminations.



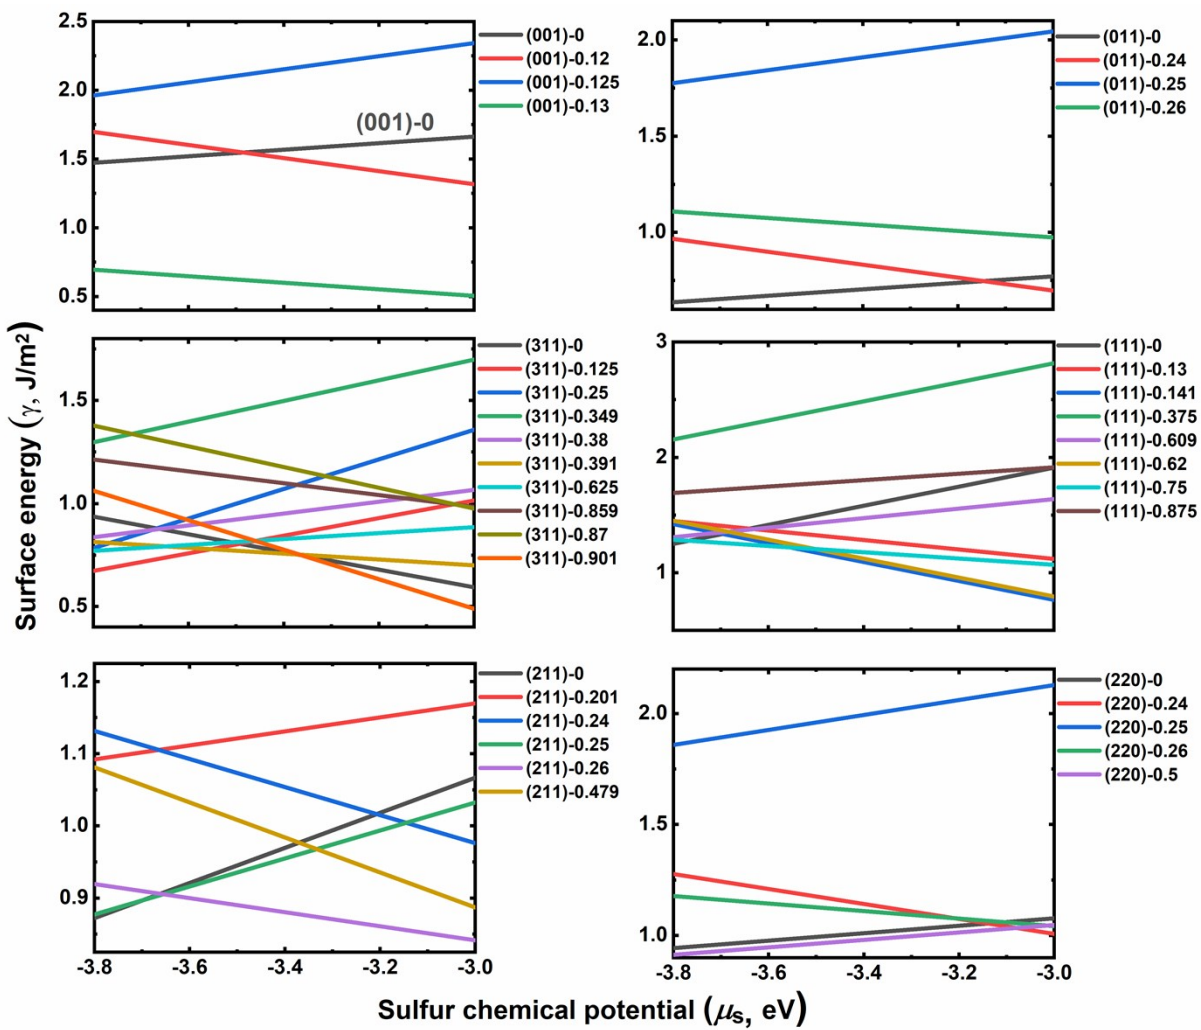

**Fig. S9** The surface energy of  $\text{Fe}_3\text{S}_4$  with different terminations.

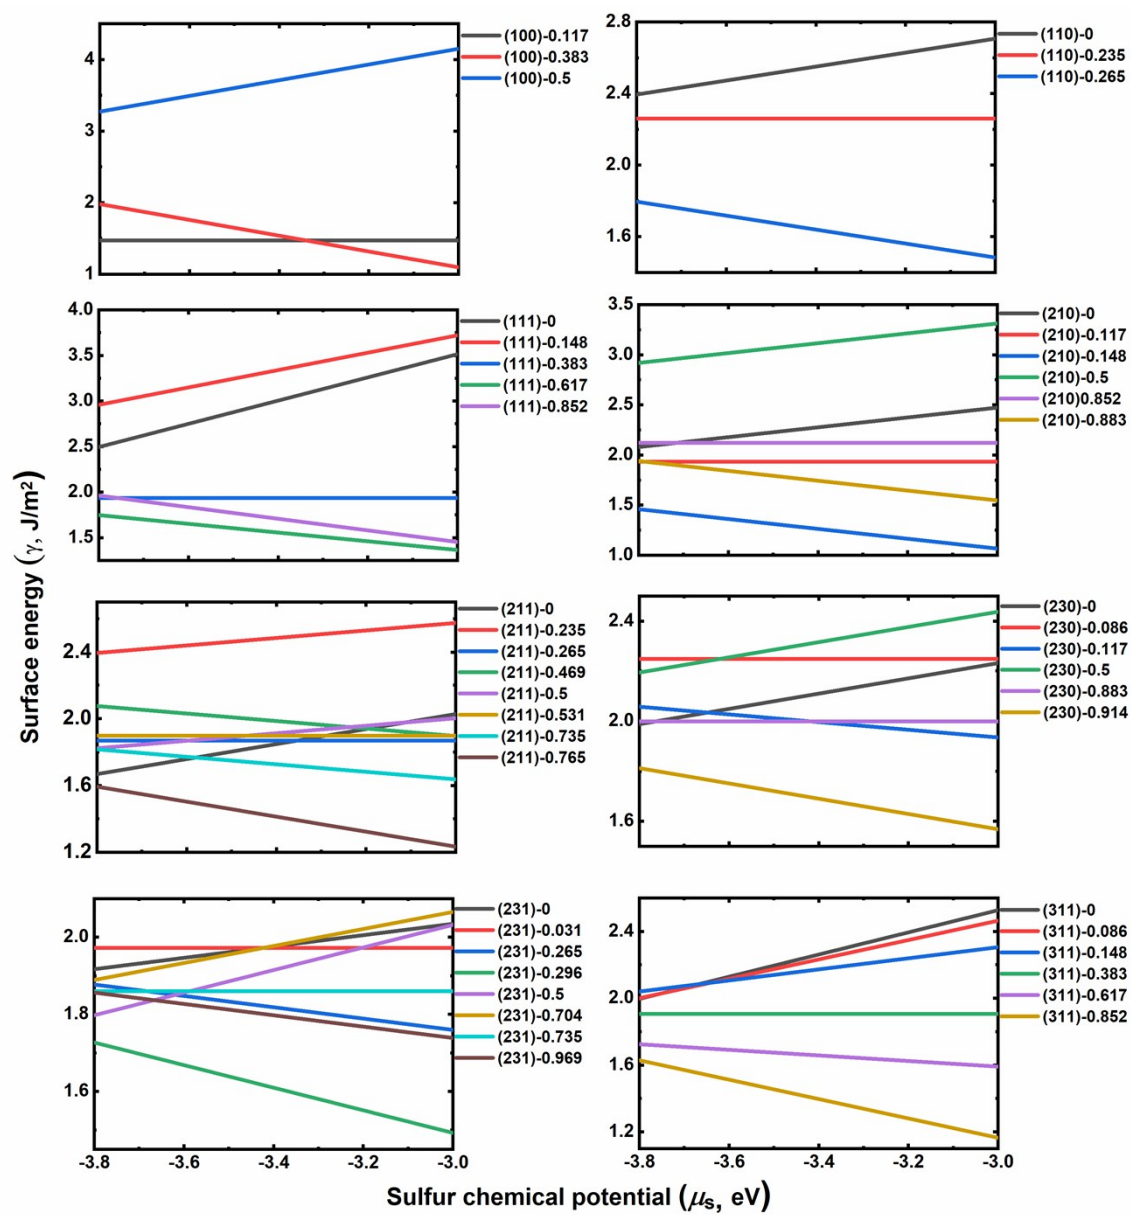

**Fig. S10** The surface energy of  $\text{FeS}_2\text{-P}$  with different terminations.

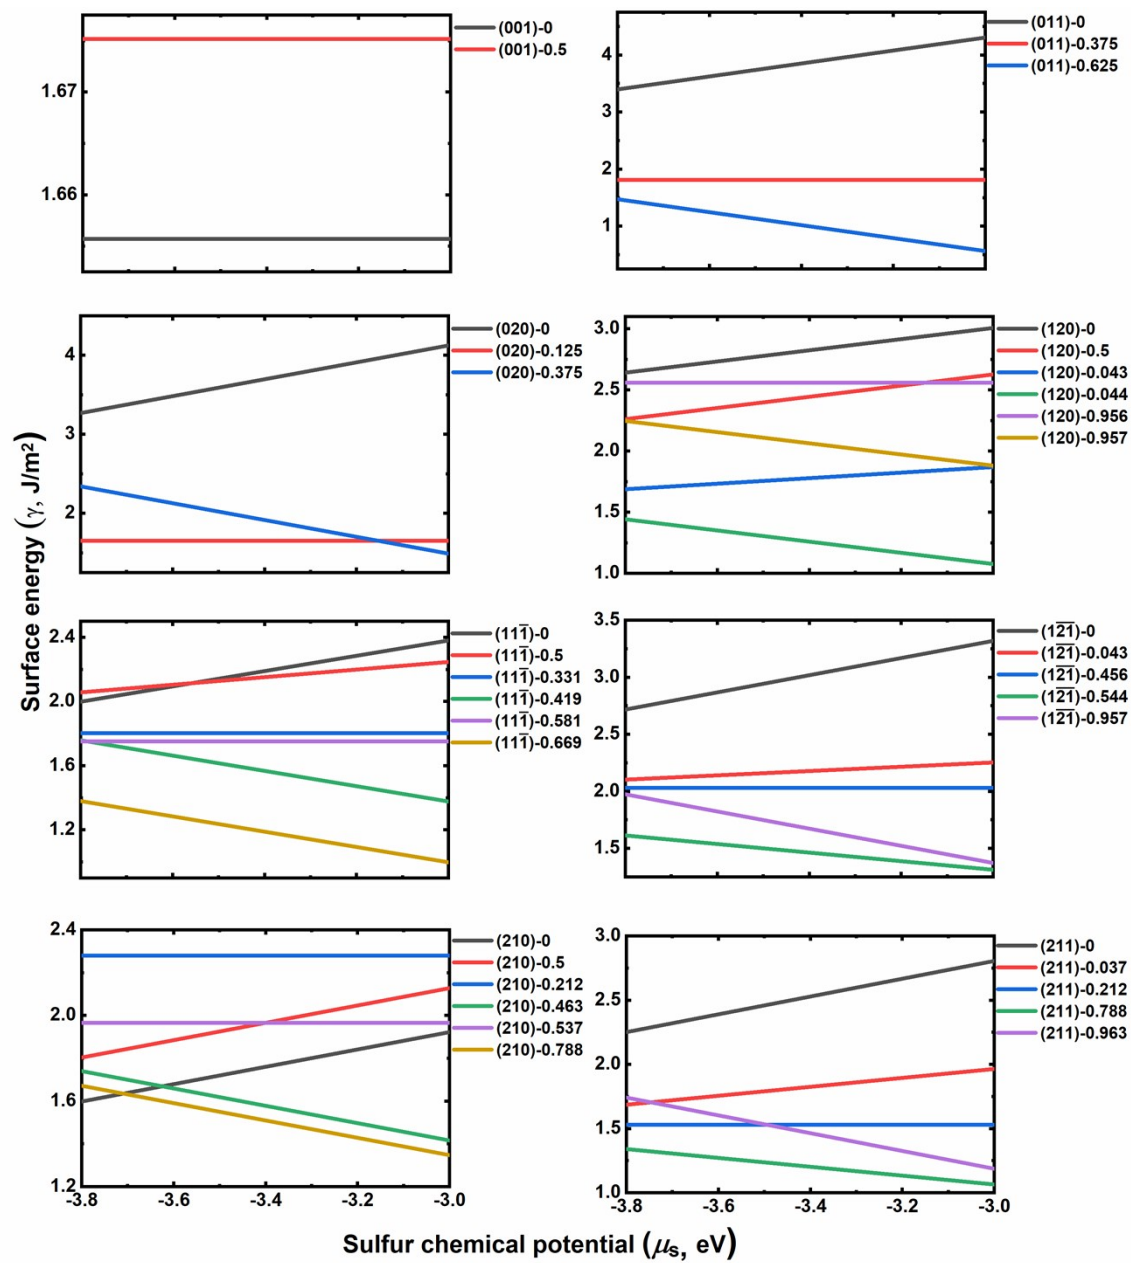

Fig. S11 The surface energy of  $\text{FeS}_2\text{-M}$  with different terminations.

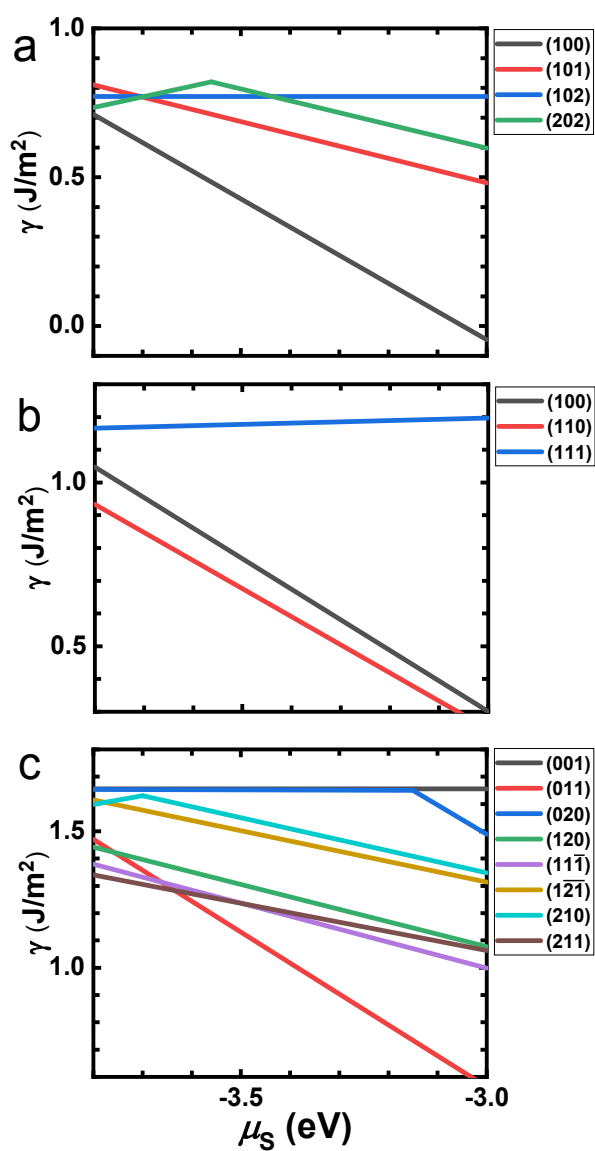

**Fig. S12** The surface energy ( $\gamma$ ,  $\text{J/m}^2$ ) of the most stable terminations as a function of sulfur chemical potential ( $\mu_s$ , eV), **a-c** for FeS-T, Fe<sub>9</sub>S<sub>10</sub>, and FeS<sub>2</sub>-M, respectively.

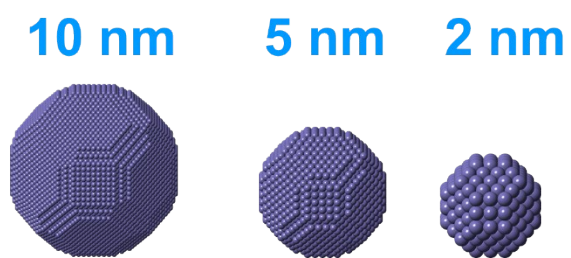

**Fig. S13** The morphology of Fe nanoparticles with different sizes.

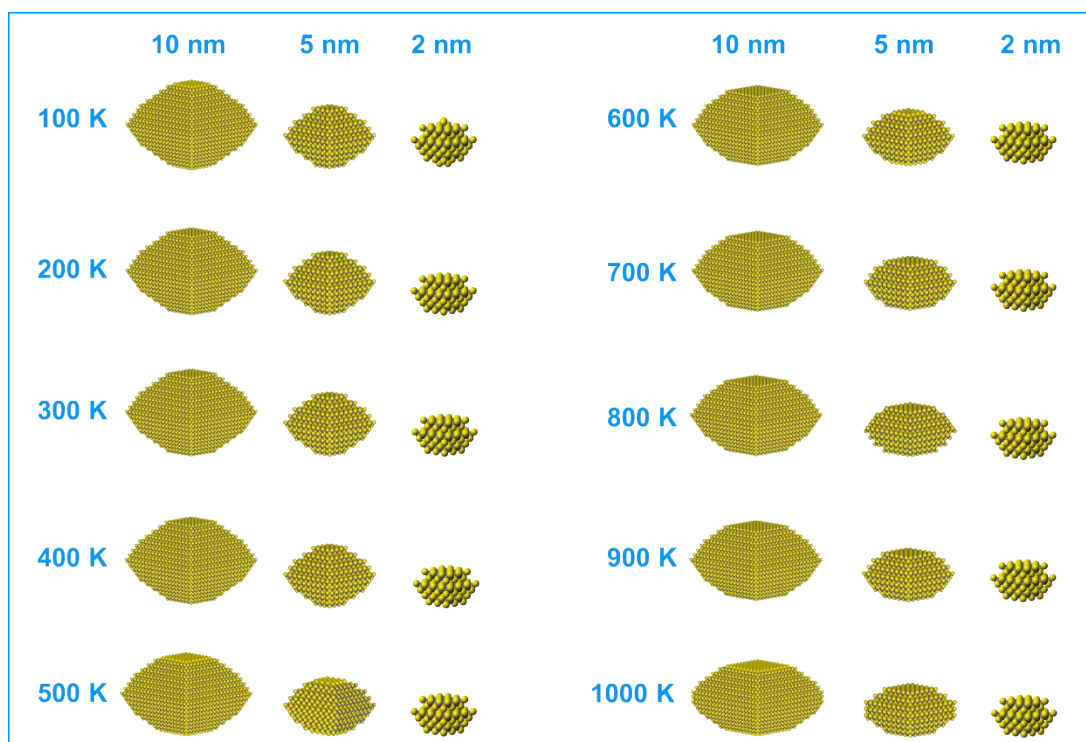

**Fig. S14** The morphology of different size FeS-M nanoparticles under varying temperatures.

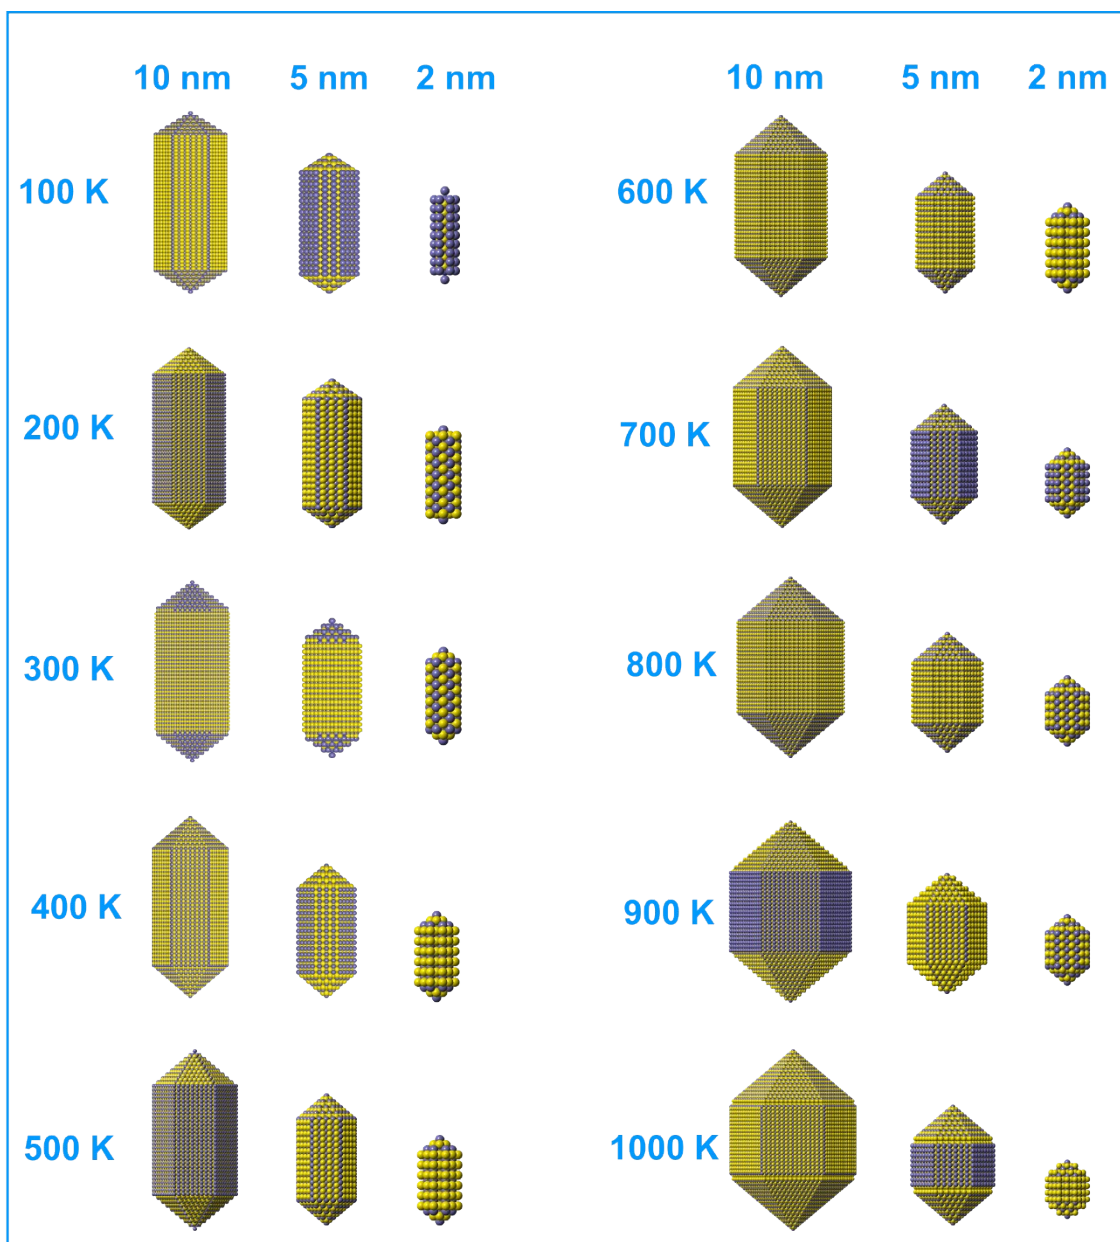

**Fig. S15** The morphology of different size FeS-T nanoparticles under varying temperatures.



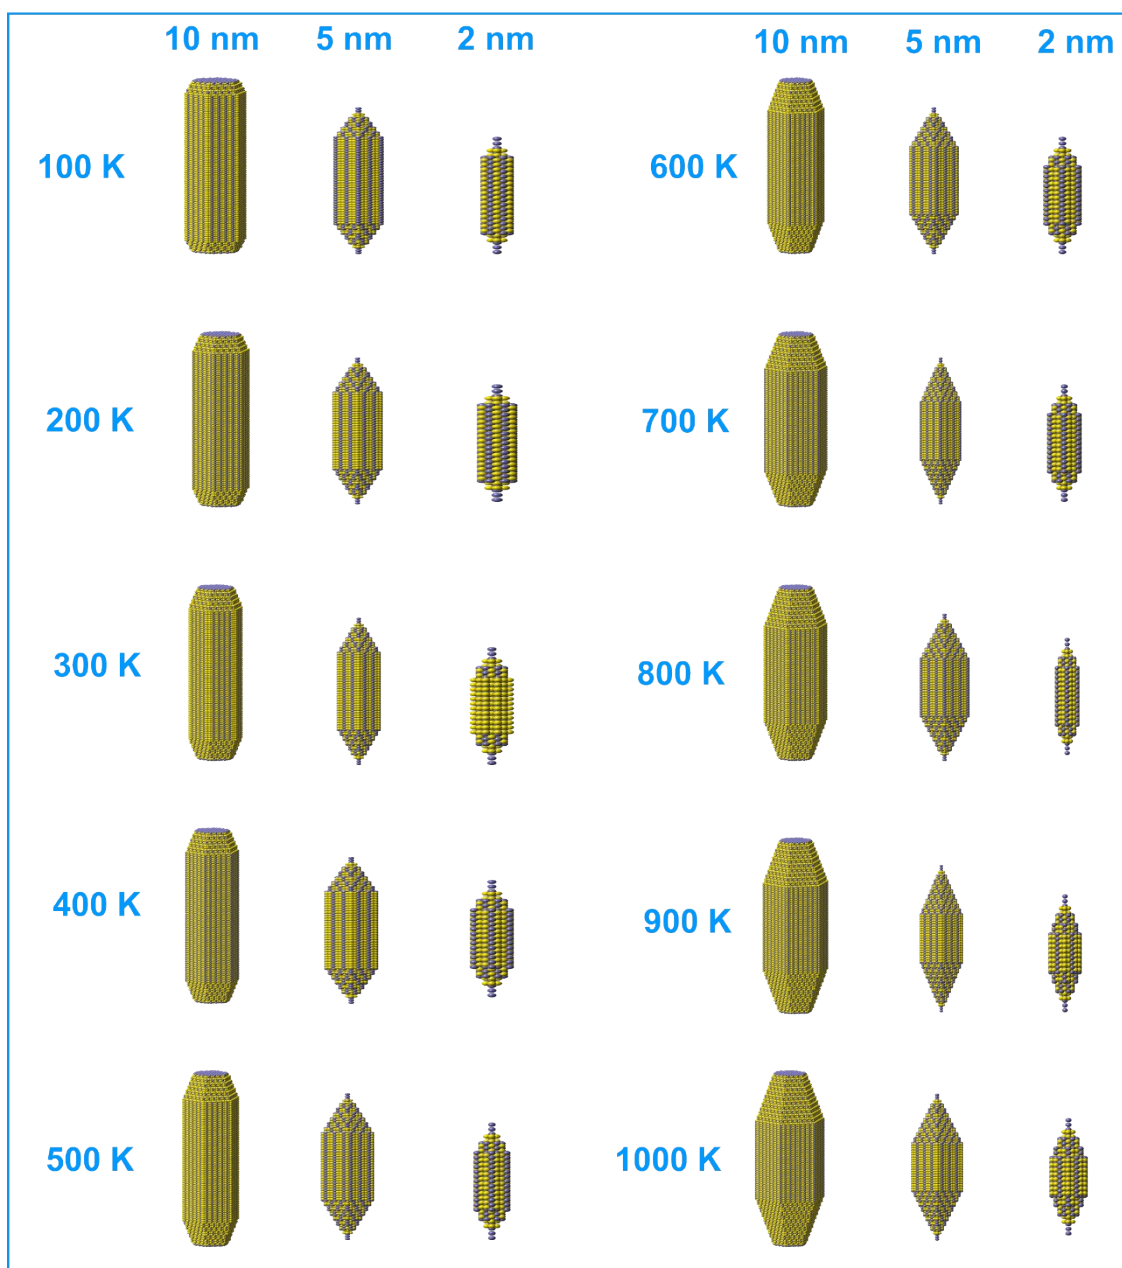

**Fig. S16** The morphology of different size  $\text{Fe}_9\text{S}_{10}$  nanoparticles under varying temperatures.



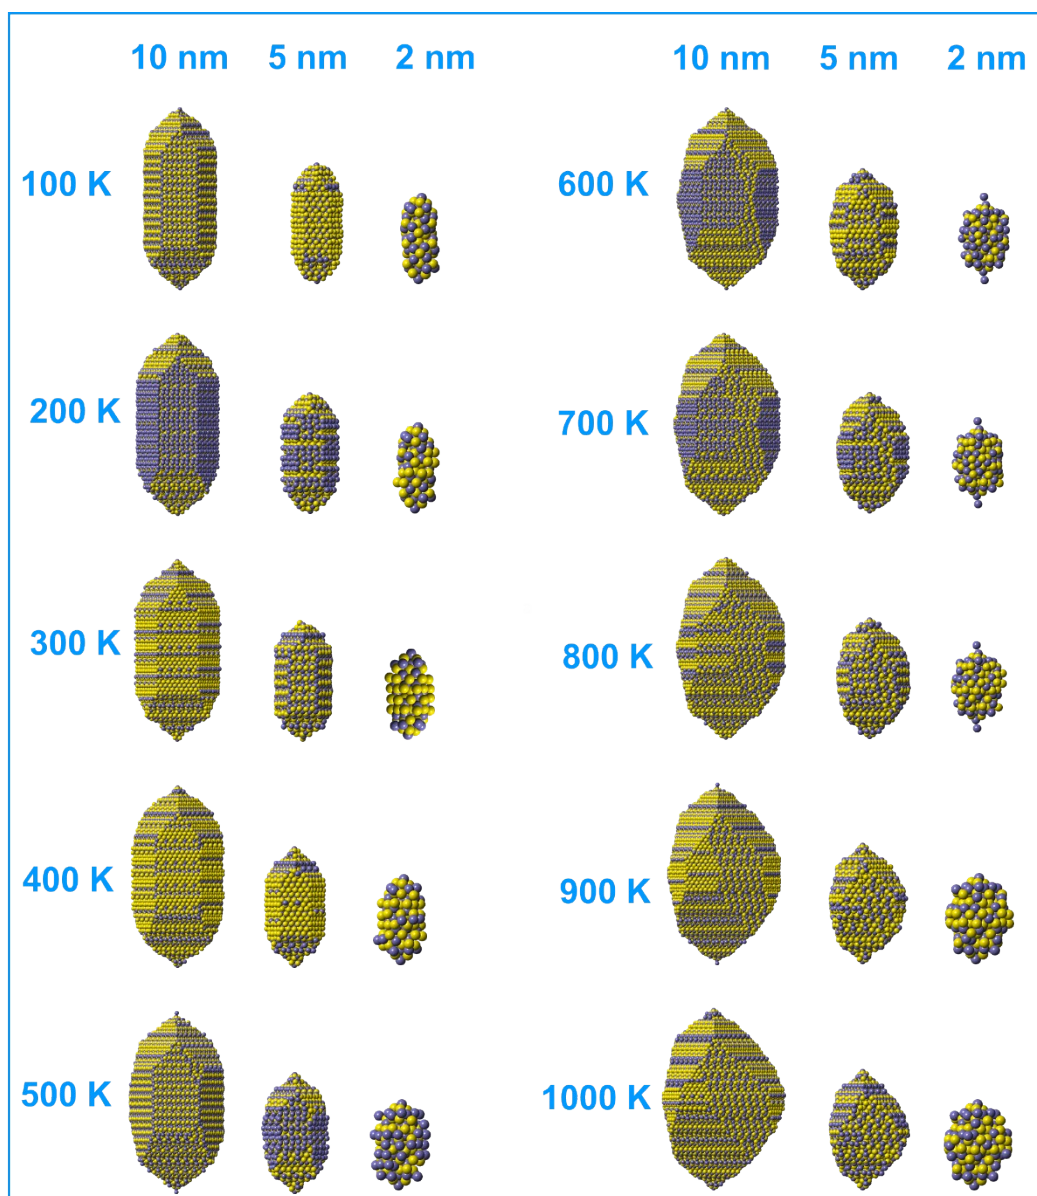

**Fig. S17** The morphology of different size Fe<sub>7</sub>S<sub>8</sub> nanoparticles under varying temperatures.

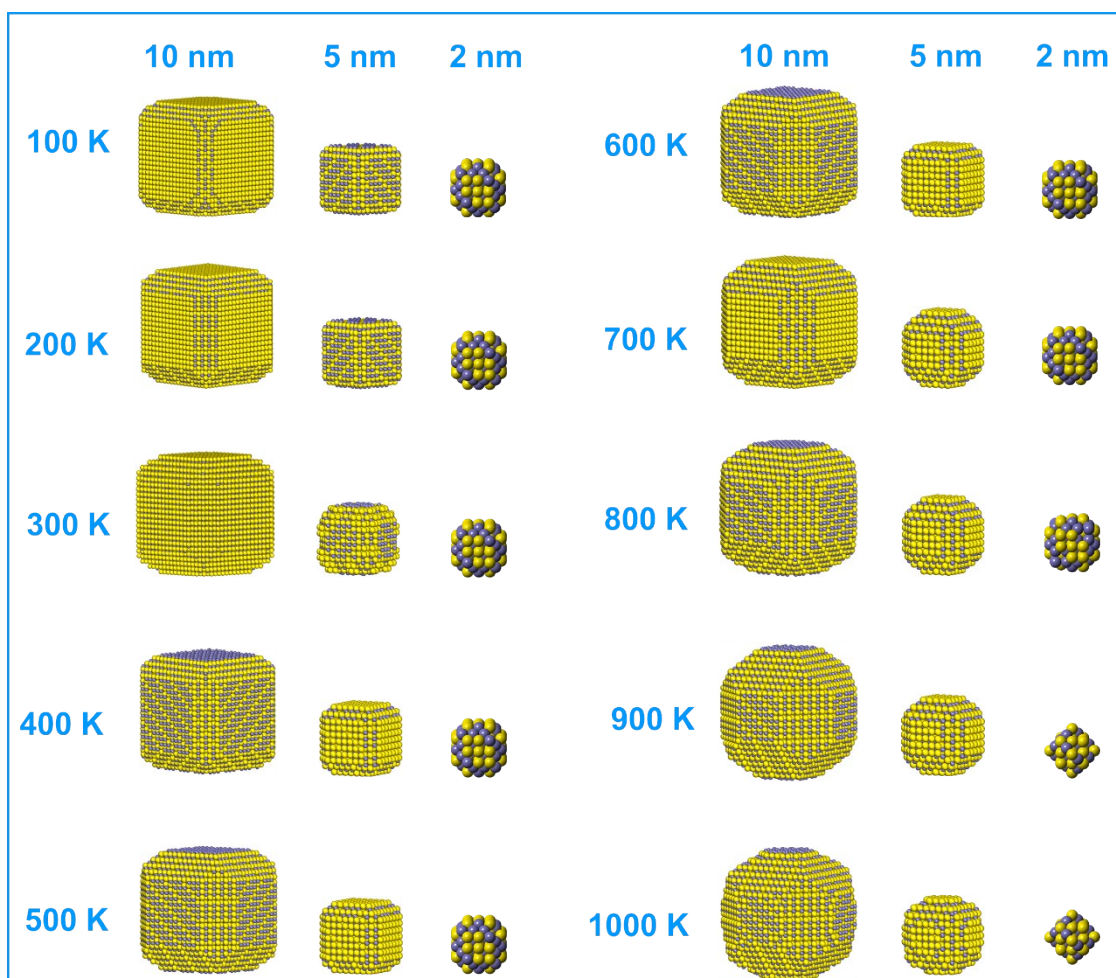

**Fig. S18** The morphology of different size  $\text{Fe}_3\text{S}_4$  nanoparticles under varying temperatures.

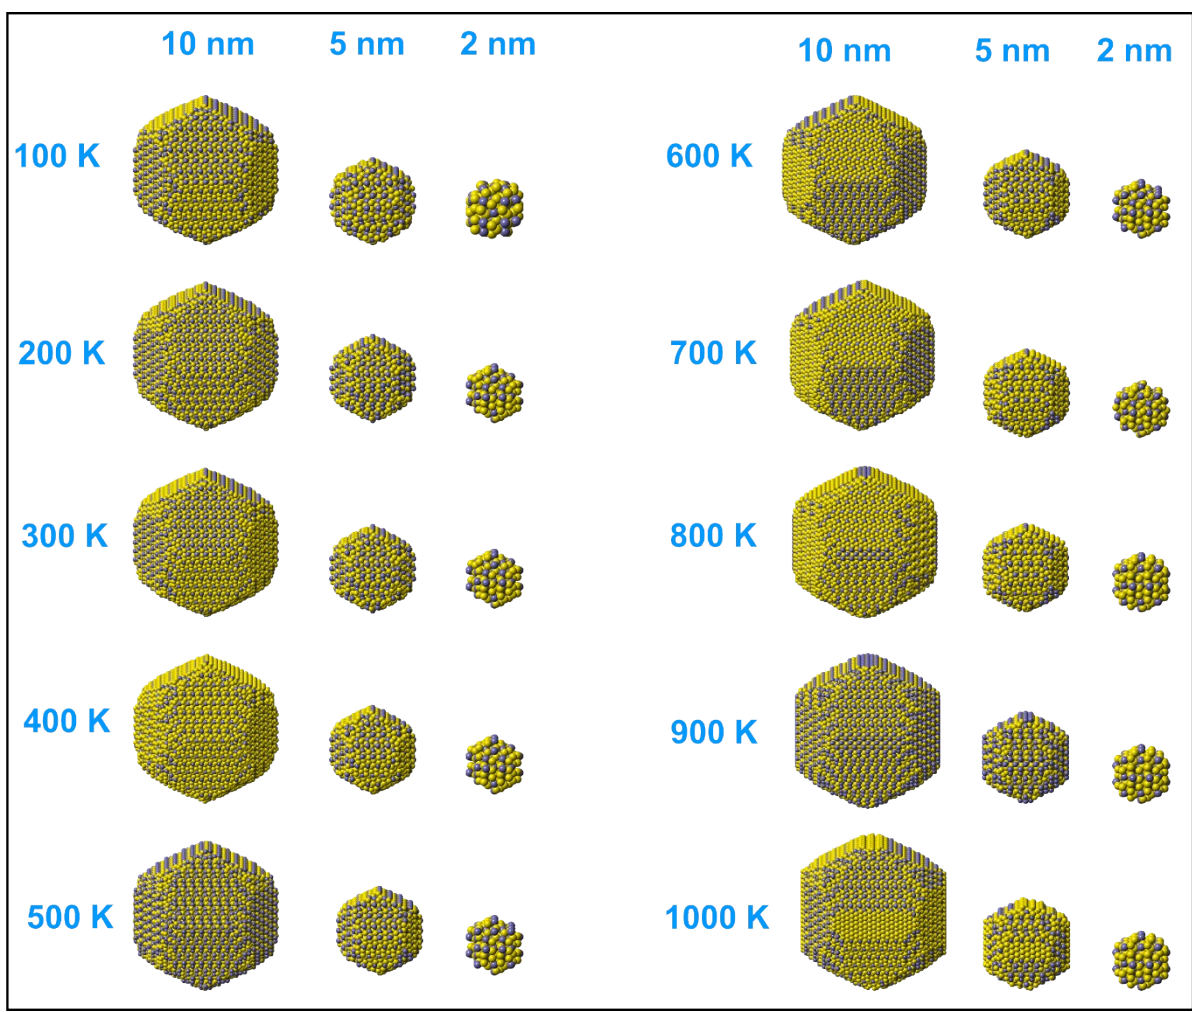

**Fig. S19** The morphology of different size FeS<sub>2</sub>-P nanoparticles under varying temperatures.

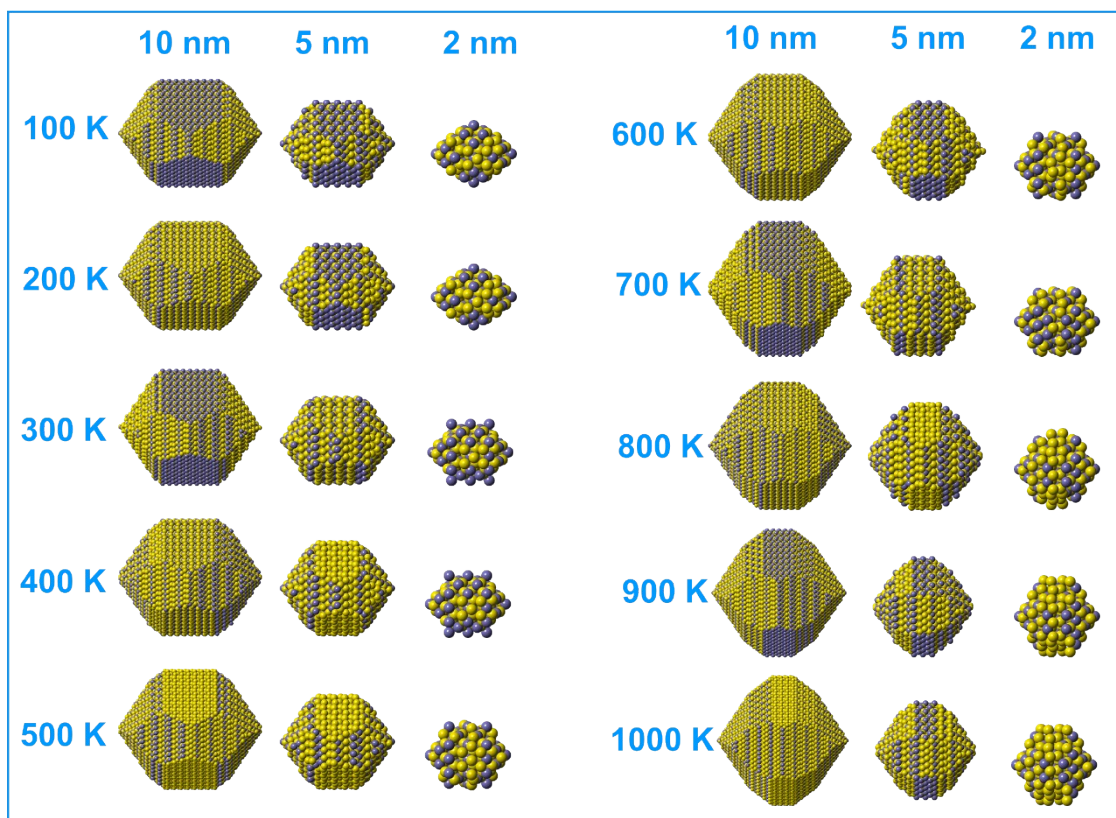

**Fig. S20** The morphology of different size FeS<sub>2</sub>-M nanoparticles under varying temperatures.

## References

- 1 J. Liu, A. Xu, Y. Meng, Y. He, P. Ren, W. P. Guo, Q. Peng, Y. Yang, H. Jiao, Y. Li and X. D. Wen, *Comput. Mater. Sci.*, 2019, **164**, 99–107.
- 2 X.-W. Liu, S. Zhao, Y. Meng, Q. Peng, A. K. Dearden, C.-F. Huo, Y. Yang, Y.-W. Li and X.-D. Wen, *Sci. Rep.*, 2016, **6**, 1–10.
- 3 K. D. Kwon, K. Refson, S. Bone, R. Qiao, W. L. Yang, Z. Liu and G. Sposito, *Phys. Rev. B - Condens. Matter Mater. Phys.*, 2011, **83**, 64402.
- 4 M. Tokonami, K. Nishiguchi and N. Morimoto, *Am. Mineral.*, 1972, **57**, 1066–1080.
- 5 B. J. Skinner, R. C. Erd and F. Grimaldi, *Am. Mineral.*, 1964, **49**, 543–555.
- 6 S. L. Finklea, L. Cathey and E. L. Amma, *Acta Crystallogr. Sect. A*, 1976, **32**, 529–537.
